# Supplementary material for: Subanesthetic isoflurane abates ROS-activated MAPK/NF-κB signaling to repress ischemia-induced microglia inflammation and brain injury
Source: PubMed Central journal article supplement (PMC7803578; doi:10.18632/aging.202349), 2020-12-28
Supplement: aging-12-202349-s001.pdf [file aging-12-202349-s001.pdf]

## SUPPLEMENTARY FIGURE

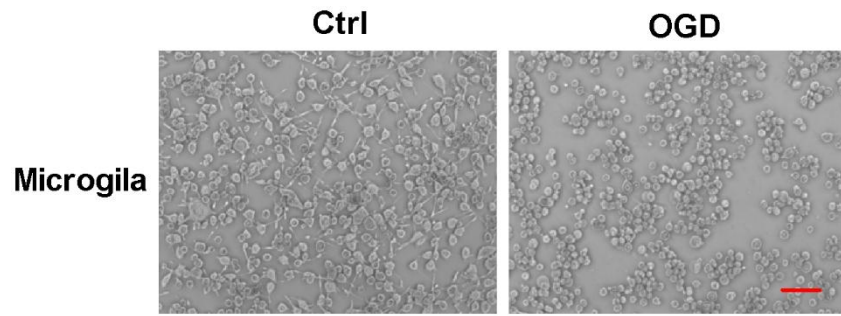

**Supplementary Figure 1. The pictures of OGD-treated microglial cells in co-cultures.** After co-cultures were treated with or without OGD for 3 h, the non-contact inserts (upper chamber) of transwell apparatus were removed, and the pictures of OGD-treated microglial cells (lower chamber) were taken under a microscope. Scale bar: 20  $\mu\text{m}$ . Ctrl: control; OGD: oxygen and glucose deprivation.
